# Supplementary material for: Acclimation of C4 metabolism to low light in mature maize leaves could limit energetic losses during progressive shading in a crop canopy
Source: PubMed Central journal article supplement (PMC4085954; doi:10.1093/jxb/eru052), 2014-03-03

**Supplementary Figure S 1.**  $\xi$  values for the calculation of  $\Delta$  (Table 1). Error bars show one standard error. n=6.

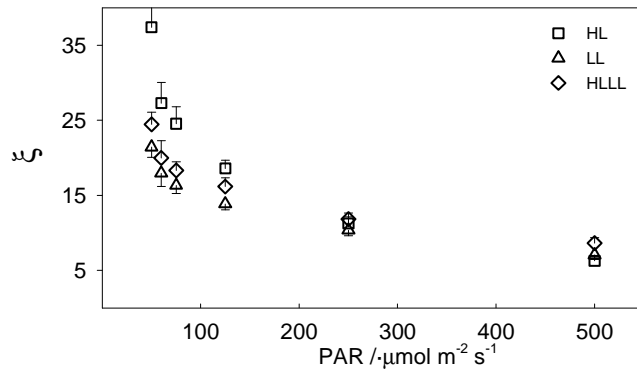

Supplement: supp_eru052_jexbot113985_file001.pdf [file supp_eru052_jexbot113985_file001.pdf]
